# Supplementary material
Source: PubMed Central journal article supplement (PMC2937442)
Supplement: supp_78_9_3801__1.pdf [file supp_78_9_3801__1.pdf]

Table S1. DNA primers used in this study.

---

GUF: GCGGCCGCCCAAACATCTTCGTTGTTG  
GUR: TGGATCCGGCTATTTGTAGTATTAATAGC  
GDF: AGGATCCCTCTCGTTTTATATCTGAGCGA  
GDR: TGGTACCAACGCTACCGCTACCGAAAGTG  
C1F: GGATCCCCCTCCGATAAAGAGCTATGCAAG  
C1R: GCGGCCGCCTCCGATAAAGAGCTATGCAAG  
C2F: GCGGCCGCCTCCGATAAAGAGCTATGCAAG  
C2R: GGATCCGAATGCCGTTTCGGCCTACCTTTC  
GMF: CTCGAGGCCCTCCGATAAAGAGCTATG  
GMR: GAATTCATTCATGTAGCCGATTTTCGAC  
GSF: GCATAAGGGGGTTTCTGTATTCACG  
GSR: CATCAATAAGCGTAACTTATCCGCG  
EMF: ATGACAAAAAAGAAATTGCCCG  
EMR: GGATCCCCTACGAAGGATGAAATTT  
REALpg0778F2: TTGTACCCGAAGGGAGTACG  
REALpg0778R2: TGGATCGAACGGAGAAAGAG  
REALpg0832F1: CGCAAGAATAAGCGGAATC  
REALpg0832R1: CTGATAAACCTGCCCGTTGT  
REALpg1677F1: TCTTTGCCATCAATGAGCTG  
REALpg1677R1: TCACTTTGGTAAGGGGGATG  
REALpg1676F1: GTCCGCTTAGCAGCGAATAC  
REALpg1676R1: GATCTGTCCTTCAGGCAAGC  
REALpg1675F1: CGTCGCAGCACAAAGAAATA  
REALpg1675R1: AAAGCATCTCATTGCCCATC  
REALpg1674F1: AGTAGGCAGCGAAGCCATTA  
REALpg1674R1: ATTTACGCTTACCCAAACG  
REALpg1673F2: TCGCTCGTGAACGAGTAATG  
REALpg1673R2: GAATCGGGCGTAGGACAGTA  
REALpgn1302F1: CGTTTGTGTAGCTGCGGTA  
REALpgn1302R2: GATAAGCCCCGTCATCTGAA  
REALpgn1242F1: TCGGGATGAGAAAGATGTCC  
REALpgn1242R2: AGAGTGCGGAGAAAGCGATA  
REALpgn1255F1: TCGACATCAAGCACGAAGAG

REALpgn1255R1: GAAGCTGTAGTCGCGGTTTC

REALN1970F1: CACCGAAGTTCAAACCCCTA

REALN1970R1: GAGGGTGCAATCAGGACATT

REALN1466F1: AGCTCAGGTGCCTACCTTCA

REALN1466R1: AGCGATCAGCACATCCTTCT

REALN1728F1: GCTCCGACTACTCGAACGAC

REALN1728R1: AGGCACAGCAATCAACTTCC

pg16SrF1: CTTGACTTCAGTGGCGGCA

pg16SrR1: AGGGAAGACGGTTTTTCACCA

---
