# Supplementary material
Source: PubMed Central journal article supplement (PMC2937442)

Fig. S1

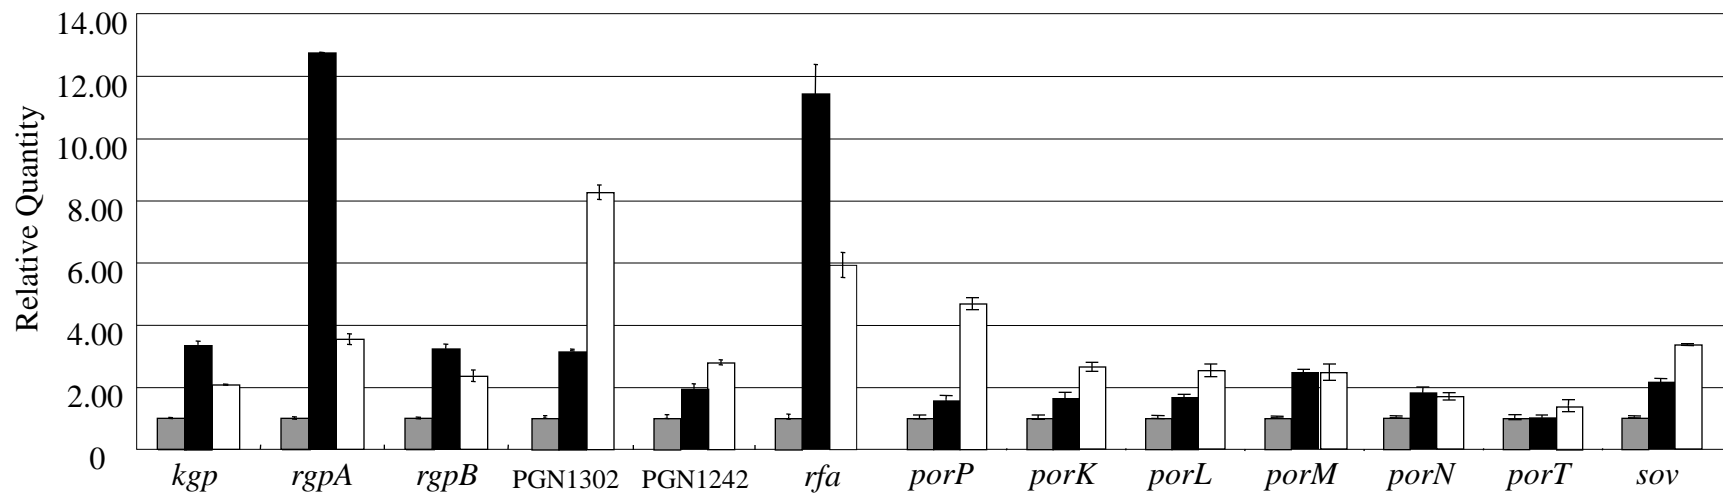

Supplement: supp_78_9_3801__2.pdf [file supp_78_9_3801__2.pdf]
